# Supplementary material for: Amino acid assisted templating synthesis of hierarchical zeolitic imidazolate framework-8 for efficient arsenate removal
Source: Royal Society of Chemistry journal article supplement (doi:10.1039/c3nr04390h), 2013-10-25
Supplement: c3nr04390h.pdf [file c3nr04390h.pdf]

## Supporting Information for

### Amino Acid Assisted Templating Synthesis of Hierarchical Zeolitic Imidazolate Framework-8 for Efficient Arsenate Removal

Yi-nan Wu, Meimei Zhou, Bingru Zhang, Baozhen Wu, Jie Li, Junlian Qiao, Xiaohong Guan, and Fengting Li\*

College of Environmental Science and Engineering, State Key Laboratory of Pollution Control and Resource Reuse, Tongji University, Siping Rd 1239, 200092 Shanghai, China.

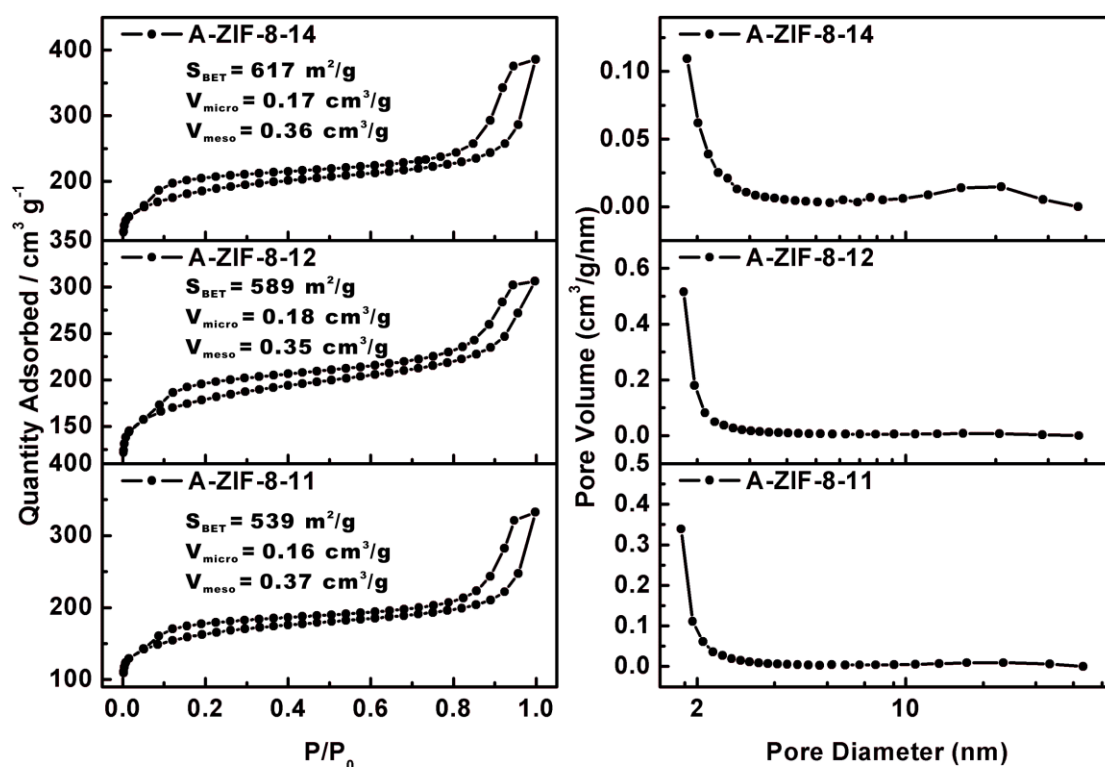

**Figure S1** N<sub>2</sub> adsorption-desorption isotherms of the A-ZIF-8 with different CTAB:His molar ratios: 1:1, 1:2, 1:4 and corresponding distributions of pore diameters obtained from the desorption branch using Barrett-Joyner-Halenda (BJH) method.

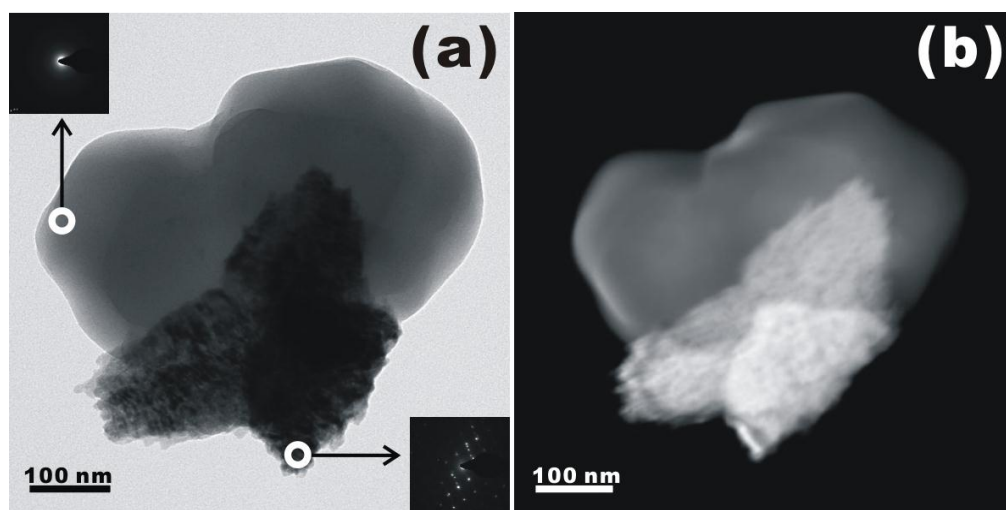

**Figure S2** a) The TEM image of the normal ZIF-8 nanocrystal synthesized in water and concomitant byproduct, in which the corresponding SAED patterns indicates the crystalline byproduct are not the ZIF-8. b) The corresponding STEM image, different contrasts of which also show the coexistence of ZIF-8 and crystalline byproduct.

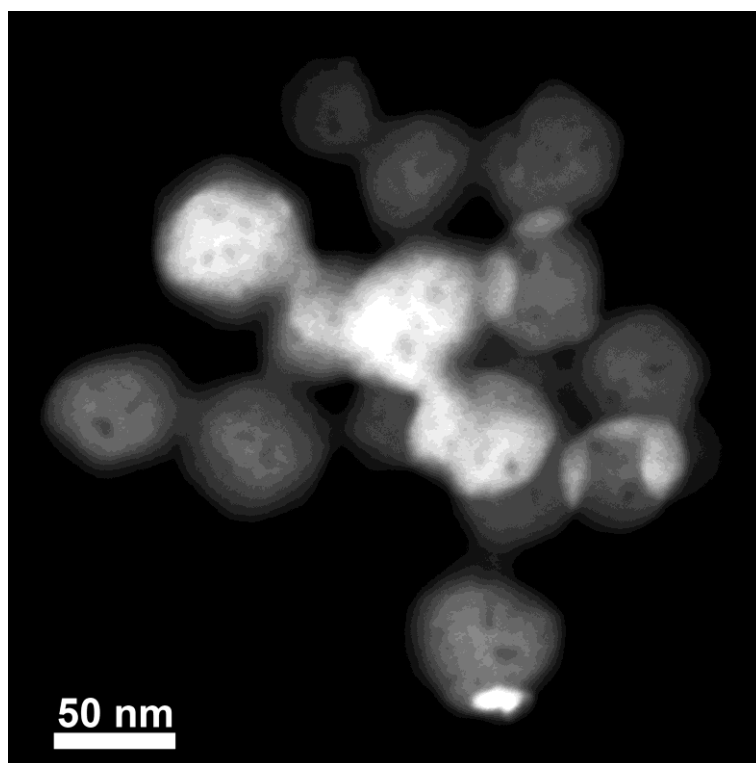

**Figure S3** HAADF-STEM image of hierarchically structured ZIF-8 for CTAB:His ratio of 1:4

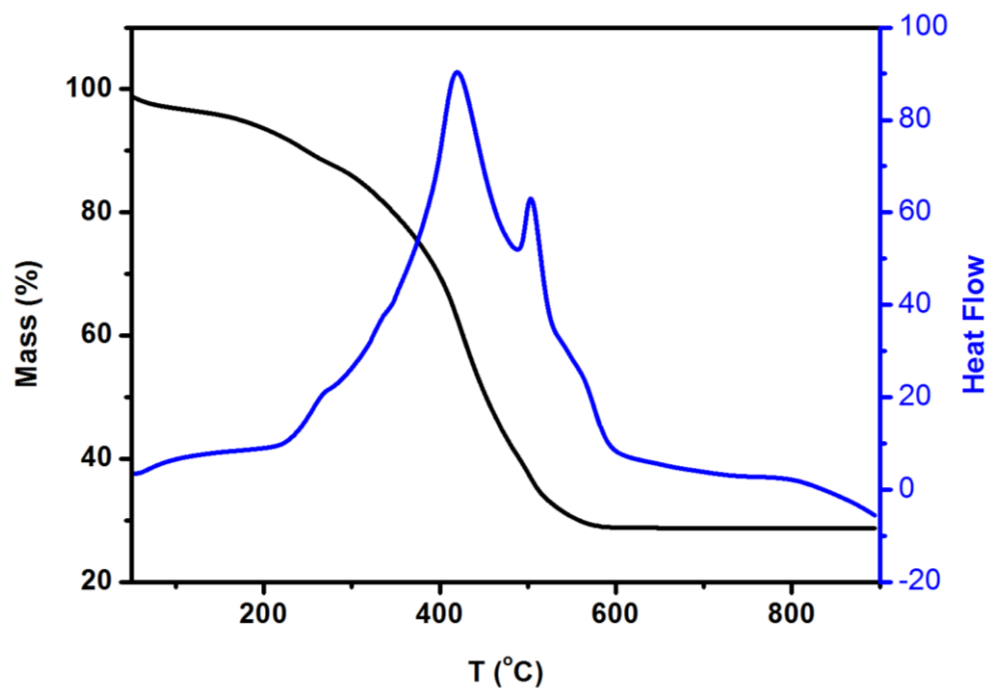

**Figure S4** TGA and DTA curves for the as-prepared H-ZIF-8-14, denoted as H-ZIF-8-14-AP in a flow of air.

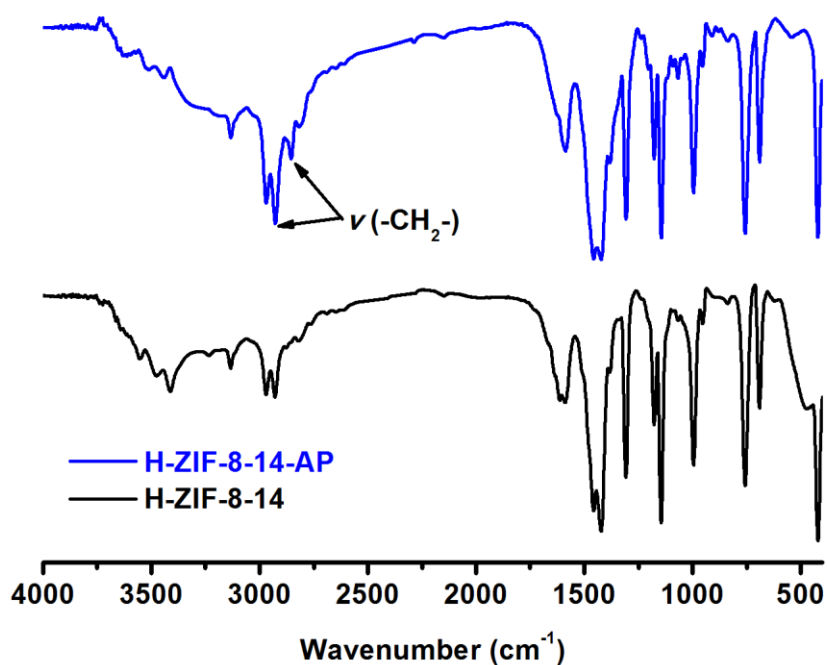

**Figure S5** FT-IR results of as-prepared H-ZIF-8-14 (H-ZIF-8-14-AP) and H-ZIF-8-14.

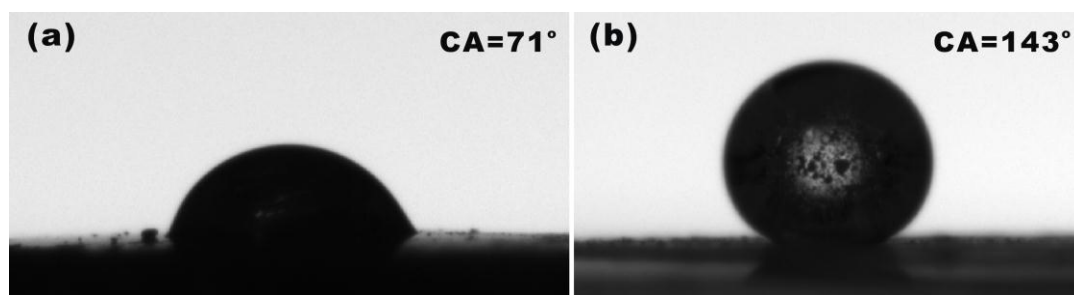

**Figure S6** Optical images of a water droplet on the sample tablet prepared by a) normal ZIF-8 and b) H-ZIF-8-14.

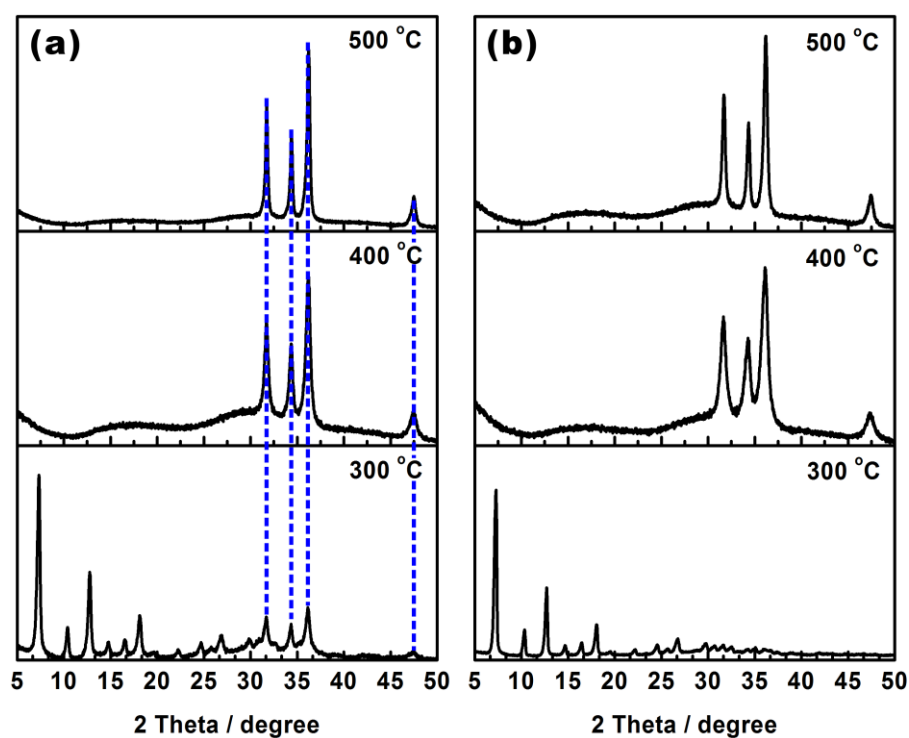

**Figure S7** XRD patterns of (a) normal ZIF-8 synthesized in water and (b) H-ZIF-8-14 samples heated at different temperatures in air for 1 hour.

ZnO was formed when the temperature was higher than 300 °C, which is indexed in Figure S7 based on the criterion pattern of ZnO (JCPDS No. 65-3411).

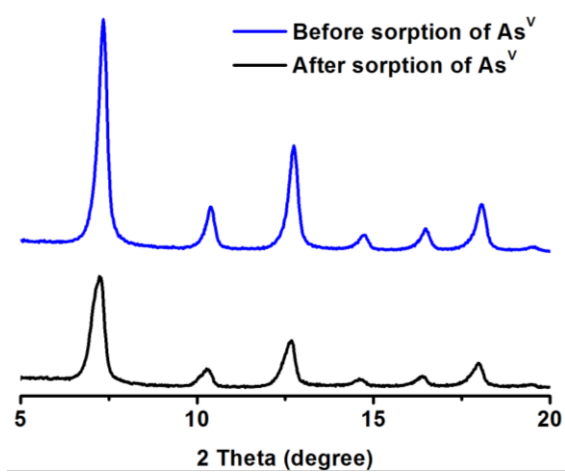

**Figure S8** The XRD patterns of the H-ZIF-8-14 before and after sorption of As<sup>V</sup>.

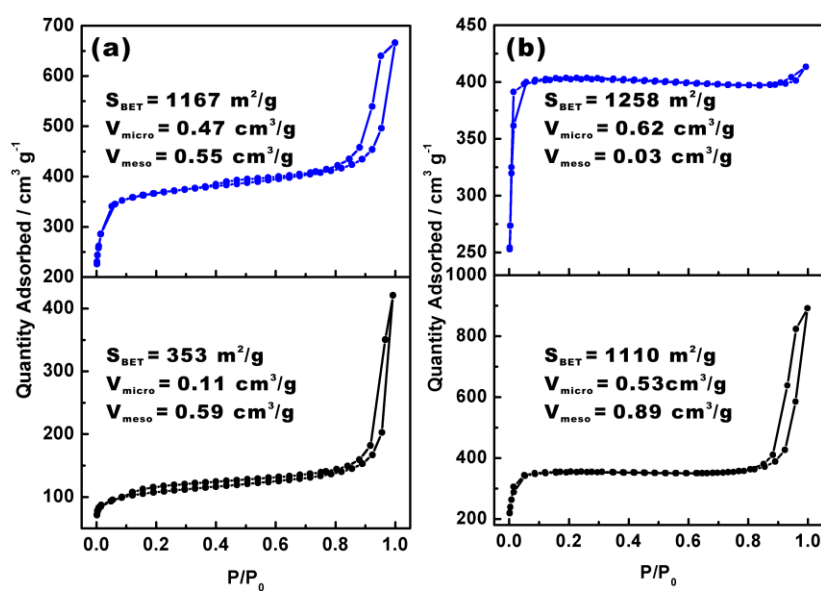

**Figure S9** N<sub>2</sub> adsorption-desorption isotherms of a) the H-ZIF-8-14 and b) ZIF-8-MeOH before and after sorption of As<sup>V</sup>.

**Table S1.** Regeneration of adsorbent H-ZIF-8-14 (initial concentration of As<sup>V</sup>: 5.0 mg·L<sup>-1</sup>, dose (m/V) = 40 mg·L<sup>-1</sup>, t = 24 h, T = 25 °C, pH = 7.0)

| Stripping Cycle | Recycle Efficiency |
|-----------------|--------------------|
|                 | (%)                |
| 1               | 96.18              |
| 2               | 88.04              |
| 3               | 83.21              |
